# Supplementary material for: STAT3 Activation in Skeletal Muscle Links Muscle Wasting and the Acute Phase Response in Cancer Cachexia
Source: PLoS One. 2011 Jul 20;6(7):e22538. doi: 10.1371/journal.pone.0022538 (PMC3140523; doi:10.1371/journal.pone.0022538)
Supplement: Table S5 — Documented physical and functional interactions between STAT3 and other genes, by Genomatix. (XLS) [file pone.0022538.s005.xls]

## Sheet: Sheet3
Table S5: Documented physical and functional interactions between STAT3 and other genes, by Genomatix Bibliosphere.
Agt regulates Stat3
Alk regulates Stat3
Ar interacts with Stat3
Bcl6 is competitor to Stat3
Bmp4 regulates Stat3
Bmx interacts with Stat3
Brca1 interacts with Stat3
Ccnd1 regulates Stat3
Cntf regulates Stat3
Csf2 regulates Stat3
Ctf1 regulates Stat3
Egf regulates Stat3
Egfr cooperates with Stat3
Eif2ak2 interacts with Stat3
Erbb2 interacts with Stat3
Fert2 interacts with Stat3
Fgf1 regulates Stat3
Fgf2 regulates Stat3
Fos cooperates with Stat3
Ghr interacts with Stat3
Gtf2i interacts with Stat3
Hgf regulates Stat3
Hif1a interacts with Stat3
Ifnar1 interacts with Stat3
Ifng regulates Stat3
Il10 regulates Stat3
Il11 regulates Stat3
Il13 regulates Stat3
Il15 regulates Stat3
Il1b regulates Stat3
Il2 regulates Stat3
Il21 regulates Stat3
Il23a regulates Stat3
Il24 regulates Stat3
Il27 regulates Stat3
Il4 regulates Stat3
Il5 regulates Stat3
Il6 regulates Stat3
Il6st interacts with Stat3
Il7 regulates Stat3
Il9 regulates Stat3
Irf1 cooperates with Stat3
Isl1 interacts with Stat3
Jak1 interacts with Stat3
Jak2 regulates Stat3
Jak3 regulates Stat3
Jun interacts with Stat3
Khdrbs1 interacts with Stat3
Lepr regulates Stat3
Lif regulates Stat3
Mapk1 regulates Stat3
Mapk8 regulates Stat3
Mitf cooperates with Stat3
Myod1 interacts with Stat3
Ncoa1 interacts with Stat3
Nfkb1 interacts with Stat3
Nlk interacts with Stat3
Nr3c1 interacts with Stat3
Pdia3 interacts with Stat3
Pias3 regulates Stat3
Pik3r1 interacts with Stat3
Pml interacts with Stat3
Prkcd interacts with Stat3
Prl regulates Stat3
Ptpn11 regulates Stat3
Ptpn2 interacts with Stat3
Rac1 regulates Stat3
Rela interacts with Stat3
Smad1 interacts with Stat3
Sp1 cooperates with Stat3
Sp3 cooperates with Stat3
Stat1 interacts with Stat3
Stat3 cooperates with Hnf1a
Stat3 interacts with Bhlhe40
Stat3 interacts with Ep300
Stat3 interacts with Hnf1a
Stat3 interacts with Il23r
Stat3 interacts with Kat5
Stat3 interacts with Map3k1
Stat3 interacts with Mapk1
Stat3 interacts with Mtor
Stat3 interacts with Ndufa13
Stat3 interacts with Pias3
Stat3 interacts with Stap2
Stat3 interacts with Syk
Stat3 interacts with Tslp
Stat3 interacts with Wt1
Stat3 interacts with Zfp467
Stat3 regulates Akt1
Stat3 regulates Bcl2
Stat3 regulates Bcl2l1
Stat3 regulates Bcl6
Stat3 regulates Birc5
Stat3 regulates Ccnd1
Stat3 regulates Cntf
Stat3 regulates Ecel1
Stat3 regulates Eed
Stat3 regulates Egf
Stat3 regulates Fos
Stat3 regulates Gabpa
Stat3 regulates Gfap
Stat3 regulates Hgf
Stat3 regulates Hif1a
Stat3 regulates Il10
Stat3 regulates Il10
Stat3 regulates Jak3
Stat3 regulates Jak3
Stat3 regulates Lif
Stat3 regulates Mcl1
Stat3 regulates Myod1
Stat3 regulates Nfkb1
Stat3 regulates Pcsk1
Stat3 regulates Rho
Stat3 regulates Slc9a3
Stat3 regulates Sox2
Stat3 regulates Stat1
Stat3 regulates Tert
Stat3 regulates Timp1
Stat3 regulates Tnf
Stat3 regulates Vegfa
Tnf regulates Stat3
Tyk2 regulates Stat3
Vegfa regulates Stat3
Wt1 regulates Stat3
