# Supplementary material for: STAT3 Activation in Skeletal Muscle Links Muscle Wasting and the Acute Phase Response in Cancer Cachexia
Source: PLoS One. 2011 Jul 20;6(7):e22538. doi: 10.1371/journal.pone.0022538 (PMC3140523; doi:10.1371/journal.pone.0022538)
Supplement: Table S6 — Validated STAT3 target genes, based upon the literature. (XLS) [file pone.0022538.s006.xls]

## Sheet: Table S6
Table S6: Validated STAT3 target genes, based upon the literature.
Gene Symbol	Gene Description
A2m	alpha-2-macroglobulin
Acot8	acyl-CoA thioesterase 8
Aff4	AF4/FMR2 family, member 4
Agt	angiotensinogen (serpin peptidase inhibitor, clade A, member 8)
Akap12	A kinase (PRKA) anchor protein (gravin) 12
Akap2	A kinase (PRKA) anchor protein 2
Angpt1	angiopoietin 1
Anpep	alanyl (membrane) aminopeptidase
Apol6	apolipoprotein L 6
Atf3	activating transcription factor 3
Bag4	BCL2-associated athanogene 4
Bcl3	B-cell leukemia/lymphoma 3
Bcl6	B-cell leukemia/lymphoma 6
Boc	biregional cell adhesion molecule-related/down-regulated by oncogenes (Cdon) binding protein
C4b	complement component 4B (Childo blood group)
C4bp-ps1	complement component 4 binding protein, pseudogene 1
Capn2	calpain 2
Ccl11	chemokine (C-C motif) ligand 11
Ccl2	chemokine (C-C motif) ligand 2
Ccnd1	cyclin D1
Cd38	CD38 antigen
Cd74	CD74 antigen (invariant polypeptide of major histocompatibility complex, class II antigen-associated)
Cdkn1a	cyclin-dependent kinase inhibitor 1A (P21)
Cdkn1b	cyclin-dependent kinase inhibitor 1B
Cdkn2d	cyclin-dependent kinase inhibitor 2D (p19, inhibits CDK4)
Chd8	chromodomain helicase DNA binding protein 8
Cited2	Cbp/p300-interacting transactivator, with Glu/Asp-rich carboxy-terminal domain, 2
Cln6	ceroid-lipofuscinosis, neuronal 6
Cnnm1	cyclin M1
Crem	cAMP responsive element modulator
Crp	C-reactive protein, pentraxin-related
Csf1r	colony stimulating factor 1 receptor
Csf2ra	colony stimulating factor 2 receptor, alpha, low-affinity (granulocyte-macrophage)
Ctsk	cathepsin K
Cxcl1	chemokine (C-X-C motif) ligand 1
Cxcl10	chemokine (C-X-C motif) ligand 10
Cxcl11	chemokine (C-X-C motif) ligand 11
Cxcl12	chemokine (C-X-C motif) ligand 12
Cxcl2	chemokine (C-X-C motif) ligand 2
Cxcl3	chemokine (C-X-C motif) ligand 3
Cxcl5	chemokine (C-X-C motif) ligand 5
Cxcl9	chemokine (C-X-C motif) ligand 9
Cyp19a1	cytochrome P450, family 19, subfamily a, polypeptide 1
Cyr61	cysteine rich protein 61
Dact1	dapper homolog 1, antagonist of beta-catenin (xenopus)
Ddef2	development and differentiation enhancing factor 2
Dlx2	distal-less homeobox 2
Dusp5	dual specificity phosphatase 5
Dzip1	DAZ interacting protein 1
Ect2	ect2 oncogene
Egr1	early growth response 1
Ell2	elongation factor RNA polymerase II 2
Eppk1	epiplakin 1
Ets2	E26 avian leukemia oncogene 2, 3' domain
Ext1	exostoses (multiple) 1
Fas	Fas (TNF receptor superfamily member 6)
Fasl	Fas ligand (TNF superfamily, member 6)
Fcer1g	Fc receptor, IgE, high affinity I, gamma polypeptide
Fgg	fibrinogen gamma chain
Fgl2	fibrinogen-like protein 2
Fgr	Gardner-Rasheed feline sarcoma viral (Fgr) oncogene homolog
Fn1	fibronectin 1
Fos	FBJ osteosarcoma oncogene
Fosl1	fos-like antigen 1
Gbp1	guanylate binding protein 1
Gfap	glial fibrillary acidic protein
Has2	hyaluronan synthase 2
Hck	hemopoietic cell kinase
Hgf	hepatocyte growth factor
Hic2	hypermethylated in cancer 2
Hmox1	heme oxygenase (decycling) 1
Hp	haptoglobin
Icam1	intercellular adhesion molecule 1
Ier3	immediate early response 3
Il10	interleukin 10
Il18r1	interleukin 18 receptor 1
Il18rap	interleukin 18 receptor accessory protein
Il28ra	interleukin 28 receptor alpha
Il2ra	interleukin 2 receptor, alpha chain
Il6	interleukin 6
Il6st	interleukin 6 signal transducer
Indo	indoleamine 2,3-dioxygenase 1
Irf1	interferon regulatory factor 1
Itga11	integrin alpha 11
Itgb2	integrin beta 2
Jak2	Janus kinase 2
Jun	Jun oncogene
Junb	Jun-B oncogene
Kit	kit oncogene
Klf2	Kruppel-like factor 2 (lung)
Klf4	Kruppel-like factor 4 (gut)
Klf5	Kruppel-like factor 5
Lcat	lecithin cholesterol acyltransferase
Lcp2	lymphocyte cytosolic protein 2
Ldlr	low density lipoprotein receptor
Loxl2	lysyl oxidase-like 2
Ltbp3	latent transforming growth factor beta binding protein 3
Ly6a	lymphocyte antigen 6 complex, locus A
Maff	v-maf musculoaponeurotic fibrosarcoma oncogene family, protein F (avian)
Map2k3	mitogen-activated protein kinase kinase 3
Map3k14	mitogen-activated protein kinase kinase kinase 14
Mcl1	myeloid cell leukemia sequence 1
Mitf	microphthalmia-associated transcription factor
Mmp10	matrix metallopeptidase 10
Mmp2	matrix metallopeptidase 2
Mrps34	mitochondrial ribosomal protein S34
Ms4a2	membrane-spanning 4-domains, subfamily A, member 2
Mt1	metallothionein 1
Muc1	mucin 1, transmembrane
Myc	myelocytomatosis oncogene
Myd88	myeloid differentiation primary response gene 88
Myh10	myosin, heavy polypeptide 10, non-muscle
Ncf2	neutrophil cytosolic factor 2
Nfil3	nuclear factor, interleukin 3, regulated
Nfkbia	nuclear factor of kappa light polypeptide gene enhancer in B-cells inhibitor, alpha
Nmu	neuromedin U
Nnmt	nicotinamide N-methyltransferase
Nos2	nitric oxide synthase 2, inducible
Notch4	Notch gene homolog 4 (Drosophila)
Nox1	NADPH oxidase 1
Npc1	Niemann Pick type C1
Obfc2a	oligonucleotide/oligosaccharide-binding fold containing 2A
Ocln	occludin
Oprm1	opioid receptor, mu 1
Osmr	oncostatin M receptor
Pak2	p21 protein (Cdc42/Rac)-activated kinase 2
Pax1	paired box gene 1
Pax4	paired box gene 4
Paxip1	PAX interacting (with transcription-activation domain) protein 1
Pbef1	nicotinamide phosphoribosyltransferase
Pcnt	pericentrin (kendrin)
Pecam1	platelet/endothelial cell adhesion molecule 1
Peg10	paternally expressed 10
Perq1	GRB10 interacting GYF protein 1
Pfkfb3	6-phosphofructo-2-kinase/fructose-2,6-biphosphatase 3
Pim1	proviral integration site 1
Pim2	proviral integration site 2
Pip5k1a	phosphatidylinositol-4-phosphate 5-kinase, type 1 alpha
Pitpnb	phosphatidylinositol transfer protein, beta
Plaur	plasminogen activator, urokinase receptor
Plec1	plectin 1
Plekhc1	fermitin family homolog 2 (Drosophila)
Pmaip1	phorbol-12-myristate-13-acetate-induced protein 1
Pomc	pro-opiomelanocortin-alpha
Prap1	proline-rich acidic protein 1
Prf1	perforin 1 (pore forming protein)
Ptp4a1	protein tyrosine phosphatase 4a1
Ptprg	protein tyrosine phosphatase, receptor type, G
Pxn	paxillin
Rgs16	regulator of G-protein signaling 16
Rgs18	regulator of G-protein signaling 18
Sdc1	syndecan 1
Sema3g	sema domain, immunoglobulin domain (Ig), short basic domain, secreted, (semaphorin) 3G
Sema4d	sema domain, immunoglobulin domain (Ig), transmembrane domain (TM) and short cytoplasmic domain, (semaphorin) 4D
Serpina1
Serpine1	serine (or cysteine) peptidase inhibitor, clade E, member 1
Sertad1	SERTA domain containing 1
Sgk	serum/glucocorticoid regulated kinase 1
Sipa1	signal-induced proliferation associated gene 1
Slc25a25	solute carrier family 25 (mitochondrial carrier, phosphate carrier), member 25
Slc2a3	solute carrier family 2 (facilitated glucose transporter), member 3
Smad7	MAD homolog 7 (Drosophila)
Smad9	MAD homolog 9 (Drosophila)
Snf1lk	salt inducible kinase 1
Socs3	suppressor of cytokine signaling 3
Stap2	signal transducing adaptor family member 2
Stat1	signal transducer and activator of transcription 1
Stat3	signal transducer and activator of transcription 3
Taf1a	TATA box binding protein (Tbp)-associated factor, RNA polymerase I, A
Tek	endothelial-specific receptor tyrosine kinase
Thbs1	thrombospondin 1
Timp1	tissue inhibitor of metalloproteinase 1
Tpm4	tropomyosin 4
Trh	thyrotropin releasing hormone
Tspan7	tetraspanin 7
Ugcg	UDP-glucose ceramide glucosyltransferase
Uqcr	ubiquinol-cytochrome c reductase (6.4kD) subunit
V2r4	vomeronasal 2, receptor 42
Vav1	vav 1 oncogene
Vegfa	vascular endothelial growth factor A
Vegfa	vascular endothelial growth factor A
Vim	vimentin
Wars	tryptophanyl-tRNA synthetase
Wee1	WEE 1 homolog 1 (S. pombe)
Xbp1	X-box binding protein 1
Zfp36l2	zinc finger protein 36, C3H type-like 2
Zyx	zyxin
